# Supplementary material
Source: Springer Nature journal article supplement (https://www.springermedizin.de/resource/supplementary/12906_2008_236_MOESM3_ESM.pdf/9524338)
Supplement: MOESM3 [file 9524338]

The description of the NP included:

- (a) If the NP is (or was made from) a plant, microorganism or animal:
  - I. The genus and species
  - II. The part of the plant, microorganism or animal that was used
  - II. How the NP was prepared (extracted or processed)
- (b) If the NP was composed of one or more chemical constituent(s), either derived from a plant, microorganism or animal or produced synthetically:
  - I. The complete name of the chemical constituent(s)
- (c) If the NP was a commercially prepared product (regardless if it fits into category (a) or (b):
  - I. The brand name
  - II. The manufacturer
  - III. The lot or batch number(s)
- (d) The name(s) of the active or marker chemical(s)
- (e) The amount (weight or %) of the active or marker chemical(s)
- (f) A qualitative and quantitative analysis of active or marker chemical(s)
- (g) The dosage form
- (h) The daily dose

The NP and placebo/comparison treatment were matched in terms of:

- (a) Taste, smell and / or appearance
- (b) Dosing regimen

The success of blinding was evaluated
